# Supplementary material for: Low temperature phase transition induced biaxial negative thermal expansion of 2,4-dinitroanisole
Source: Royal Society of Chemistry journal article supplement (doi:10.1039/c5ce00029g), 2015-01-01
Supplement: c5ce00029g1.pdf [file c5ce00029g1.pdf]

Supporting Information

## Low temperature phase transition induced biaxial negative thermal expansion of 2,4-dinitroanisole

5 Hiroki Takahashi,\*<sup>a</sup> and Rui Tamura <sup>a</sup>

*Department of Interdisciplinary Environment, Graduate School of Human and Environmental Studies,  
Kyoto University, Kyoto 606-8501, Japan.*

10 CIFs of ordered model temperature range of 298 to 261K

```
data_24dnan_298K
_audit_creation_method          SHELXL-97

_chemical_formula_sum
15 'C7 H6 N2 O5'
_chemical_formula_weight        198.14

loop_
_atom_type_symbol
20 _atom_type_description
   _atom_type_scatter_dispersion_real
   _atom_type_scatter_dispersion_imag
   _atom_type_scatter_source
   'C' 'C' 0.0033 0.0016
25 'International Tables Vol C Tables 4.2.6.8 and 6.1.1.4'
   'H' 'H' 0.0000 0.0000
   'International Tables Vol C Tables 4.2.6.8 and 6.1.1.4'
   'N' 'N' 0.0061 0.0033
   'International Tables Vol C Tables 4.2.6.8 and 6.1.1.4'
30 'O' 'O' 0.0106 0.0060
   'International Tables Vol C Tables 4.2.6.8 and 6.1.1.4'

_symmetry_cell_setting          monoclinic
_symmetry_space_group_name_H-M  'P 21/n'
35
loop_
_symmetry_equiv_pos_as_xyz
   'x, y, z'
   '-x+1/2, y+1/2, -z+1/2'
40 '-x, -y, -z'
```

'x-1/2, -y-1/2, z-1/2'

|    |                                 |                |
|----|---------------------------------|----------------|
|    | _cell_length_a                  | 3.980(2)       |
|    | _cell_length_b                  | 13.759(7)      |
| 5  | _cell_length_c                  | 15.461(8)      |
|    | _cell_angle_alpha               | 90.00          |
|    | _cell_angle_beta                | 90.994(8)      |
|    | _cell_angle_gamma               | 90.00          |
|    | _cell_volume                    | 846.5(7)       |
| 10 | _cell_formula_units_Z           | 4              |
|    | _cell_measurement_temperature   | 298(2)         |
|    | _cell_measurement_reflns_used   | 1713           |
|    | _cell_measurement_theta_min     | 3.0            |
|    | _cell_measurement_theta_max     | 27.5           |
| 15 | _exptl_crystal_description      | 'Platelet'     |
|    | _exptl_crystal_colour           | 'Pale yellow'  |
|    | _exptl_crystal_size_max         | 0.38           |
|    | _exptl_crystal_size_mid         | 0.35           |
| 20 | _exptl_crystal_size_min         | 0.30           |
|    | _exptl_crystal_density_meas     | ?              |
|    | _exptl_crystal_density_diffn    | 1.555          |
|    | _exptl_crystal_density_method   | 'not measured' |
|    | _exptl_crystal_F_000            | 408            |
| 25 | _exptl_absorpt_coefficient_mu   | 0.135          |
|    | _exptl_absorpt_correction_type  | 'Multi-scan'   |
|    | _exptl_absorpt_correction_T_min | 0.9504         |
|    | _exptl_absorpt_correction_T_max | 0.9606         |
| 30 | _diffn_ambient_temperature      | 298(2)         |
|    | _diffn_radiation_wavelength     | 0.71075        |
|    | _diffn_radiation_type           | MoK $\gamma$ a |
|    | _diffn_reflns_number            | 9779           |
| 35 | _diffn_reflns_av_R_equivalents  | 0.0284         |
|    | _diffn_reflns_av_sigmaI/netI    | 0.0196         |
|    | _diffn_reflns_limit_h_min       | -5             |
|    | _diffn_reflns_limit_h_max       | 5              |
|    | _diffn_reflns_limit_k_min       | -17            |
| 40 | _diffn_reflns_limit_k_max       | 17             |
|    | _diffn_reflns_limit_l_min       | -20            |
|    | _diffn_reflns_limit_l_max       | 19             |
|    | _diffn_reflns_theta_min         | 3.02           |
|    | _diffn_reflns_theta_max         | 27.46          |
| 45 | _reflns_number_total            | 1936           |
|    | _reflns_number_gt               | 1327           |
|    | _reflns_threshold_expression    | >2sigma(I)     |

```

_refine_ls_structure_factor_coef  Fsqd
_refine_ls_matrix_type           full
_refine_ls_weighting_scheme      calc
_refine_ls_weighting_details
5 'calc w=1/[ $\sum s^2 (F_o^2) + (0.1841P)^2 + 0.2496P$ ] where  $P = (F_o^2 + 2F_c^2) / 3$ '
_atom_sites_solution_primary     direct
_atom_sites_solution_secondary   difmap
_atom_sites_solution_hydrogens   geom
_refine_ls_hydrogen_treatment    ?
10 _refine_ls_extinction_method  none
_refine_ls_extinction_coef       ?
_refine_ls_number_reflns         1936
_refine_ls_number_parameters     128
_refine_ls_number_restraints     0
15 _refine_ls_R_factor_all       0.1122
_refine_ls_R_factor_gt          0.0909
_refine_ls_wR_factor_ref        0.3318
_refine_ls_wR_factor_gt         0.2994
_refine_ls_goodness_of_fit_ref   1.162
20 _refine_ls_restrained_S_all   1.162
_refine_ls_shift/su_max         0.000
_refine_ls_shift/su_mean        0.000

```

loop\_

```

25 _atom_site_label
   _atom_site_type_symbol
   _atom_site_fract_x
   _atom_site_fract_y
   _atom_site_fract_z
30 _atom_site_U_iso_or_equiv
   _atom_site_adp_type
   _atom_site_occupancy
   _atom_site_symmetry_multiplicity
   _atom_site_calc_flag
35 _atom_site_refinement_flags
   _atom_site_disorder_assembly
   _atom_site_disorder_group
C1 C 0.1365(7) 0.3050(2) 0.42326(19) 0.0604(8) Uani 1 1 d . . .
C2 C 0.0132(7) 0.2400(2) 0.48492(18) 0.0560(8) Uani 1 1 d . . .
40 C3 C -0.1243(7) 0.1517(2) 0.46236(17) 0.0562(7) Uani 1 1 d . . .
H1 H -0.2073 0.1101 0.5043 0.067 Uiso 1 1 calc R . .
C4 C -0.1361(7) 0.1264(2) 0.37577(18) 0.0593(8) Uani 1 1 d . . .
C5 C -0.0159(8) 0.1888(3) 0.31313(19) 0.0698(9) Uani 1 1 d . . .
H2 H -0.0256 0.1708 0.2552 0.084 Uiso 1 1 calc R . .
45 C6 C 0.1168(9) 0.2769(3) 0.3364(2) 0.0692(9) Uani 1 1 d . . .
H3 H 0.1949 0.3186 0.2939 0.083 Uiso 1 1 calc R . .
C7 C 0.3848(11) 0.4580(3) 0.3874(3) 0.0931(13) Uani 1 1 d . . .
H6 H 0.5413 0.4254 0.3508 0.140 Uiso 1 1 calc R . .

```

H5 H 0.4955 0.5110 0.4164 0.140 Uiso 1 1 calc R . .  
 H4 H 0.2004 0.4823 0.3530 0.140 Uiso 1 1 calc R . .  
 N1 N 0.0207(8) 0.2632(2) 0.57758(17) 0.0744(9) Uani 1 1 d . . .  
 N2 N -0.2835(8) 0.0334(2) 0.35104(19) 0.0751(9) Uani 1 1 d . . .  
 5 O1 O 0.2608(7) 0.39070(18) 0.45052(16) 0.0804(8) Uani 1 1 d . . .  
 O4 O -0.3927(11) -0.0181(3) 0.4071(2) 0.1272(15) Uani 1 1 d . . .  
 O5 O -0.2937(10) 0.0114(3) 0.27530(19) 0.1184(13) Uani 1 1 d . . .  
 O2 O 0.167(2) 0.3269(4) 0.6045(2) 0.220(4) Uani 1 1 d . . .  
 O3 O -0.1103(18) 0.2138(4) 0.6260(2) 0.226(4) Uani 1 1 d . . .  
 10  
 loop\_  
 \_atom\_site\_aniso\_label  
 \_atom\_site\_aniso\_U\_11  
 \_atom\_site\_aniso\_U\_22  
 15 \_atom\_site\_aniso\_U\_33  
 \_atom\_site\_aniso\_U\_23  
 \_atom\_site\_aniso\_U\_13  
 \_atom\_site\_aniso\_U\_12  
 C1 0.0596(15) 0.0666(18) 0.0549(16) 0.0069(13) -0.0029(12) -0.0018(13)  
 20 C2 0.0587(15) 0.0631(17) 0.0460(14) -0.0009(12) -0.0023(11) 0.0005(12)  
 C3 0.0612(15) 0.0629(16) 0.0447(14) 0.0018(11) 0.0060(11) 0.0000(12)  
 C4 0.0622(16) 0.0666(18) 0.0491(15) -0.0035(13) -0.0028(12) 0.0003(13)  
 C5 0.083(2) 0.085(2) 0.0420(14) 0.0027(14) -0.0019(13) 0.0033(16)  
 C6 0.077(2) 0.079(2) 0.0513(16) 0.0170(14) 0.0018(14) -0.0007(16)  
 25 C7 0.098(3) 0.083(2) 0.097(3) 0.034(2) -0.011(2) -0.026(2)  
 N1 0.098(2) 0.0762(18) 0.0492(14) -0.0069(12) 0.0026(13) -0.0215(15)  
 N2 0.0856(19) 0.0764(18) 0.0632(17) -0.0137(14) 0.0015(14) -0.0071(14)  
 O1 0.0982(18) 0.0717(15) 0.0710(15) 0.0098(11) -0.0071(13) -0.0233(12)  
 O4 0.189(4) 0.105(2) 0.089(2) -0.0205(17) 0.033(2) -0.069(2)  
 30 O5 0.179(3) 0.111(2) 0.0648(18) -0.0240(16) -0.0141(19) -0.027(2)  
 O2 0.399(9) 0.203(5) 0.0581(18) 0.006(2) -0.029(3) -0.188(6)  
 O3 0.352(8) 0.260(6) 0.069(2) -0.060(3) 0.086(4) -0.194(6)

\_diffn\_measured\_fraction\_theta\_max 0.998  
 35 \_diffn\_reflns\_theta\_full 27.46  
 \_diffn\_measured\_fraction\_theta\_full 0.998  
 \_refine\_diff\_density\_max 0.618  
 \_refine\_diff\_density\_min -0.404  
 \_refine\_diff\_density\_rms 0.062

40

### data\_24dnan\_283K

\_audit\_creation\_method SHELXL-97  
 45 \_chemical\_formula\_sum  
 'C7 H6 N2 O5'  
 \_chemical\_formula\_weight 198.14

```

loop_
  _atom_type_symbol
  _atom_type_description
  _atom_type_scatter_dispersion_real
5  _atom_type_scatter_dispersion_imag
  _atom_type_scatter_source
  'C' 'C' 0.0033 0.0016
  'International Tables Vol C Tables 4.2.6.8 and 6.1.1.4'
  'H' 'H' 0.0000 0.0000
10 'International Tables Vol C Tables 4.2.6.8 and 6.1.1.4'
  'N' 'N' 0.0061 0.0033
  'International Tables Vol C Tables 4.2.6.8 and 6.1.1.4'
  'O' 'O' 0.0106 0.0060
  'International Tables Vol C Tables 4.2.6.8 and 6.1.1.4'
15
  _symmetry_cell_setting monoclinic
  _symmetry_space_group_name_H-M 'P 21/n'

loop_
20 _symmetry_equiv_pos_as_xyz
  'x, y, z'
  '-x+1/2, y+1/2, -z+1/2'
  '-x, -y, -z'
  'x-1/2, -y-1/2, z-1/2'
25
  _cell_length_a 3.957(2)
  _cell_length_b 13.735(7)
  _cell_length_c 15.454(8)
  _cell_angle_alpha 90.00
30 _cell_angle_beta 91.156(8)
  _cell_angle_gamma 90.00
  _cell_volume 839.7(7)
  _cell_formula_units_Z 4
  _cell_measurement_temperature 283(2)
35 _cell_measurement_reflns_used 2000
  _cell_measurement_theta_min 3.0
  _cell_measurement_theta_max 27.5

  _exptl_crystal_description 'needle'
40 _exptl_crystal_colour 'Pale yellow'
  _exptl_crystal_size_max 0.38
  _exptl_crystal_size_mid 0.35
  _exptl_crystal_size_min 0.30
  _exptl_crystal_density_meas ?
45 _exptl_crystal_density_diffn 1.567
  _exptl_crystal_density_method 'not measured'
  _exptl_crystal_F_000 408
  _exptl_absorpt_coefficient_mu 0.136

```

```

_exptl_absorpt_correction_T_min    ?
_exptl_absorpt_correction_T_max    ?
_exptl_absorpt_correction_type      multi-scan
_exptl_absorpt_process_details
5 ;CrystalClear (Rigaku Americas and Rigaku, 2009)
;

_diffn_ambient_temperature          283
10 _diffn_radiation_wavelength       0.71075
_diffn_radiation_type                MoKαa
_diffn_reflns_number                 3818
_diffn_reflns_av_R_equivalents       0.0231
_diffn_reflns_av_sigmaI/netI         0.0445
15 _diffn_reflns_limit_h_min         -5
_diffn_reflns_limit_h_max            5
_diffn_reflns_limit_k_min            -17
_diffn_reflns_limit_k_max            17
_diffn_reflns_limit_l_min            -17
20 _diffn_reflns_limit_l_max         20
_diffn_reflns_theta_min              3.25
_diffn_reflns_theta_max              27.47
_reflns_number_total                 1906
_reflns_number_gt                    1180
25 _reflns_threshold_expression       >2sigma(I)
_computing_structure_refinement      'SHELXL-97 (Sheldrick, 1997)'
_computing_molecular_graphics        'Yadokari-XG 2009 (Wakita Nemoto et al., 2009)'
_computing_publication_material
;Yadokari-XG 2009 (Wakita,Nemoto et al., 2009)
30 ;
_refine_ls_structure_factor_coef     Fsqd
_refine_ls_matrix_type               full
_refine_ls_weighting_scheme          calc
_refine_ls_weighting_details
35 'calc w=1/[σs^2+(Fo^2)+(0.1333P)^2+0.4197P] where P=(Fo^2+2Fc^2)/3'
_atom_sites_solution_primary         direct
_atom_sites_solution_secondary       difmap
_atom_sites_solution_hydrogens       geom
_refine_ls_hydrogen_treatment        ?
40 _refine_ls_extinction_method       none
_refine_ls_extinction_coef           ?
_refine_ls_number_reflns             1906
_refine_ls_number_parameters         128
_refine_ls_number_restraints         0
45 _refine_ls_R_factor_all            0.1139
_refine_ls_R_factor_gt               0.0823
_refine_ls_wR_factor_ref             0.2800
_refine_ls_wR_factor_gt              0.2494

```

|    |                                                                   |       |
|----|-------------------------------------------------------------------|-------|
|    | _refine_ls_goodness_of_fit_ref                                    | 1.128 |
|    | _refine_ls_restrained_S_all                                       | 1.128 |
|    | _refine_ls_shift/su_max                                           | 0.000 |
|    | _refine_ls_shift/su_mean                                          | 0.000 |
| 5  | loop_                                                             |       |
|    | _atom_site_label                                                  |       |
|    | _atom_site_type_symbol                                            |       |
|    | _atom_site_fract_x                                                |       |
| 10 | _atom_site_fract_y                                                |       |
|    | _atom_site_fract_z                                                |       |
|    | _atom_site_U_iso_or_equiv                                         |       |
|    | _atom_site_adp_type                                               |       |
|    | _atom_site_occupancy                                              |       |
| 15 | _atom_site_symmetry_multiplicity                                  |       |
|    | _atom_site_calc_flag                                              |       |
|    | _atom_site_refinement_flags                                       |       |
|    | _atom_site_disorder_assembly                                      |       |
|    | _atom_site_disorder_group                                         |       |
| 20 | C1 C 0.3651(8) 0.3053(2) 0.0763(2) 0.0516(8) Uani 1 1 d . . .     |       |
|    | C2 C 0.4868(8) 0.2402(2) 0.01469(18) 0.0476(8) Uani 1 1 d . A .   |       |
|    | C3 C 0.6241(8) 0.1513(2) 0.03742(18) 0.0473(7) Uani 1 1 d . . .   |       |
|    | H1 H 0.7070 0.1093 -0.0044 0.057 Uiso 1 1 calc R . .              |       |
|    | C4 C 0.6348(8) 0.1263(2) 0.12381(19) 0.0498(8) Uani 1 1 d . B .   |       |
| 25 | C5 C 0.5136(9) 0.1885(3) 0.1865(2) 0.0585(9) Uani 1 1 d . . .     |       |
|    | H2 H 0.5223 0.1701 0.2445 0.070 Uiso 1 1 calc R . .               |       |
|    | C6 C 0.3812(9) 0.2768(3) 0.1633(2) 0.0584(9) Uani 1 1 d . . .     |       |
|    | H3 H 0.3009 0.3184 0.2057 0.070 Uiso 1 1 calc R . .               |       |
|    | C7 C 0.1161(11) 0.4583(3) 0.1125(3) 0.0789(12) Uani 1 1 d . . .   |       |
| 30 | H4 H -0.0453 0.4259 0.1481 0.118 Uiso 1 1 calc R . .              |       |
|    | H5 H 0.0097 0.5125 0.0838 0.118 Uiso 1 1 calc R . .               |       |
|    | H6 H 0.3012 0.4812 0.1481 0.118 Uiso 1 1 calc R . .               |       |
|    | N1 N 0.4816(8) 0.2633(2) -0.07822(18) 0.0628(8) Uani 1 1 d . . .  |       |
|    | N2 N 0.7807(8) 0.0329(2) 0.1488(2) 0.0645(8) Uani 1 1 d . . .     |       |
| 35 | O1 O 0.2399(7) 0.39137(18) 0.04925(15) 0.0670(8) Uani 1 1 d . . . |       |
|    | O2 O 0.3354(19) 0.3276(4) -0.1050(2) 0.194(3) Uani 1 1 d . A 1    |       |
|    | O3 O 0.6154(17) 0.2140(4) -0.1262(3) 0.205(4) Uani 1 1 d . A 1    |       |
|    | O4 O 0.8906(11) -0.0189(3) 0.0927(2) 0.1125(14) Uani 1 1 d . B 1  |       |
|    | O5 O 0.7894(10) 0.0104(3) 0.22458(19) 0.1040(12) Uani 1 1 d . B 1 |       |
| 40 | loop_                                                             |       |
|    | _atom_site_aniso_label                                            |       |
|    | _atom_site_aniso_U_11                                             |       |
|    | _atom_site_aniso_U_22                                             |       |
| 45 | _atom_site_aniso_U_33                                             |       |
|    | _atom_site_aniso_U_23                                             |       |
|    | _atom_site_aniso_U_13                                             |       |
|    | _atom_site_aniso_U_12                                             |       |

C1 0.0486(17) 0.0576(18) 0.0484(17) -0.0082(14) -0.0025(13) 0.0037(14)  
 C2 0.0491(16) 0.0546(17) 0.0389(15) 0.0010(12) -0.0019(12) 0.0015(14)  
 C3 0.0498(16) 0.0532(17) 0.0392(14) -0.0022(12) 0.0063(11) 0.0008(13)  
 C4 0.0509(16) 0.0534(17) 0.0449(16) 0.0027(13) -0.0022(12) 0.0006(14)  
 5 C5 0.070(2) 0.071(2) 0.0353(15) -0.0017(14) -0.0017(13) -0.0037(17)  
 C6 0.066(2) 0.065(2) 0.0445(17) -0.0145(14) 0.0031(14) 0.0023(17)  
 C7 0.086(3) 0.070(2) 0.081(3) -0.026(2) -0.009(2) 0.022(2)  
 N1 0.084(2) 0.0614(17) 0.0428(15) 0.0044(13) 0.0009(14) 0.0171(16)  
 N2 0.075(2) 0.0651(18) 0.0531(17) 0.0119(14) 0.0017(14) 0.0070(15)  
 10 O1 0.0836(18) 0.0572(14) 0.0601(15) -0.0082(11) -0.0053(12) 0.0214(12)  
 O2 0.354(8) 0.176(4) 0.0516(19) -0.004(2) -0.028(3) 0.174(5)  
 O3 0.322(8) 0.232(6) 0.064(2) 0.060(3) 0.082(4) 0.186(6)  
 O4 0.170(4) 0.090(2) 0.078(2) 0.0194(17) 0.033(2) 0.065(2)  
 O5 0.157(3) 0.100(2) 0.0543(17) 0.0221(16) -0.0121(18) 0.026(2)  
 15

**data\_24dnan\_273K**

\_audit\_creation\_method SHELXL-97  
 \_chemical\_formula\_sum  
 20 'C7 H6 N2 O5'  
 \_chemical\_formula\_weight 198.14  
 loop\_  
 \_atom\_type\_symbol  
 \_atom\_type\_description  
 25 \_atom\_type\_scatter\_dispersion\_real  
 \_atom\_type\_scatter\_dispersion\_imag  
 \_atom\_type\_scatter\_source  
 'C' 'C' 0.0033 0.0016  
 'International Tables Vol C Tables 4.2.6.8 and 6.1.1.4'  
 30 'H' 'H' 0.0000 0.0000  
 'International Tables Vol C Tables 4.2.6.8 and 6.1.1.4'  
 'N' 'N' 0.0061 0.0033  
 'International Tables Vol C Tables 4.2.6.8 and 6.1.1.4'  
 'O' 'O' 0.0106 0.0060  
 35 'International Tables Vol C Tables 4.2.6.8 and 6.1.1.4'  
 \_symmetry\_cell\_setting monoclinic  
 \_symmetry\_space\_group\_name\_H-M 'P 21/n'  
 loop\_  
 \_symmetry\_equiv\_pos\_as\_xyz  
 40 'x, y, z'  
 '-x+1/2, y+1/2, -z+1/2'  
 '-x, -y, -z'  
 'x-1/2, -y-1/2, z-1/2'  
 \_cell\_length\_a 3.957(2)  
 45 \_cell\_length\_b 13.735(7)  
 \_cell\_length\_c 15.454(8)  
 \_cell\_angle\_alpha 90.00  
 \_cell\_angle\_beta 91.156(8)



|                                   |                                                                                   |
|-----------------------------------|-----------------------------------------------------------------------------------|
| _cell_angle_gamma                 | 90.00                                                                             |
| _cell_volume                      | 839.7(7)                                                                          |
| _cell_formula_units_Z             | 4                                                                                 |
| _cell_measurement_temperature     | 273(2)                                                                            |
| 5 _cell_measurement_reflns_used   | 2000                                                                              |
| _cell_measurement_theta_min       | 3.0                                                                               |
| _cell_measurement_theta_max       | 27.5                                                                              |
| _exptl_crystal_description        | 'needle'                                                                          |
| _exptl_crystal_colour             | 'Pale yellow'                                                                     |
| 10 _exptl_crystal_size_max        | 0.38                                                                              |
| _exptl_crystal_size_mid           | 0.35                                                                              |
| _exptl_crystal_size_min           | 0.30                                                                              |
| _exptl_crystal_density_diffn      | 1.567                                                                             |
| _exptl_crystal_F_000              | 408                                                                               |
| 15 _exptl_absorpt_coefficient_mu  | 0.136                                                                             |
| _diffn_ambient_temperature        | 273(2)                                                                            |
| _diffn_radiation_wavelength       | 0.71075                                                                           |
| _diffn_radiation_type             | MoK $\alpha$                                                                      |
| _diffn_reflns_number              | 3818                                                                              |
| 20 _diffn_reflns_av_R_equivalents | 0.0231                                                                            |
| _diffn_reflns_av_sigmaI/netI      | 0.0445                                                                            |
| _diffn_reflns_limit_h_min         | -5                                                                                |
| _diffn_reflns_limit_h_max         | 5                                                                                 |
| _diffn_reflns_limit_k_min         | -17                                                                               |
| 25 _diffn_reflns_limit_k_max      | 17                                                                                |
| _diffn_reflns_limit_l_min         | -17                                                                               |
| _diffn_reflns_limit_l_max         | 20                                                                                |
| _diffn_reflns_theta_min           | 3.25                                                                              |
| _diffn_reflns_theta_max           | 27.47                                                                             |
| 30 _reflns_number_total           | 1906                                                                              |
| _reflns_number_gt                 | 1180                                                                              |
| _reflns_threshold_expression      | >2sigma(I)                                                                        |
| _refine_ls_structure_factor_coef  | Fsqd                                                                              |
| _refine_ls_matrix_type            | full                                                                              |
| 35 _refine_ls_weighting_scheme    | calc                                                                              |
| _refine_ls_weighting_details      | 'calc w=1/[ $\sigma^2(F_o^2)+(0.1333P)^2+0.4197P$ ] where P=( $F_o^2+2F_c^2$ )/3' |
| _atom_sites_solution_primary      | direct                                                                            |
| _atom_sites_solution_secondary    | difmap                                                                            |
| 40 _atom_sites_solution_hydrogens | geom                                                                              |
| _refine_ls_hydrogen_treatment     | ?                                                                                 |
| _refine_ls_extinction_method      | none                                                                              |
| _refine_ls_extinction_coef        | ?                                                                                 |
| _refine_ls_number_reflns          | 1906                                                                              |
| 45 _refine_ls_number_parameters   | 128                                                                               |
| _refine_ls_number_restraints      | 0                                                                                 |
| _refine_ls_R_factor_all           | 0.1139                                                                            |
| _refine_ls_R_factor_gt            | 0.0823                                                                            |

|       |                                                                   |        |
|-------|-------------------------------------------------------------------|--------|
|       | _refine_ls_wR_factor_ref                                          | 0.2800 |
|       | _refine_ls_wR_factor_gt                                           | 0.2494 |
|       | _refine_ls_goodness_of_fit_ref                                    | 1.128  |
|       | _refine_ls_restrained_S_all                                       | 1.128  |
| 5     | _refine_ls_shift/su_max                                           | 0.000  |
|       | _refine_ls_shift/su_mean                                          | 0.000  |
| loop_ |                                                                   |        |
|       | _atom_site_label                                                  |        |
| 10    | _atom_site_type_symbol                                            |        |
|       | _atom_site_fract_x                                                |        |
|       | _atom_site_fract_y                                                |        |
|       | _atom_site_fract_z                                                |        |
|       | _atom_site_U_iso_or_equiv                                         |        |
| 15    | _atom_site_adp_type                                               |        |
|       | _atom_site_occupancy                                              |        |
|       | _atom_site_symmetry_multiplicity                                  |        |
|       | _atom_site_calc_flag                                              |        |
|       | _atom_site_refinement_flags                                       |        |
| 20    | _atom_site_disorder_assembly                                      |        |
|       | _atom_site_disorder_group                                         |        |
|       | C1 C 0.3651(8) 0.3053(2) 0.0763(2) 0.0516(8) Uani 1 1 d . . .     |        |
|       | C2 C 0.4868(8) 0.2402(2) 0.01469(18) 0.0476(8) Uani 1 1 d . A .   |        |
|       | C3 C 0.6241(8) 0.1513(2) 0.03742(18) 0.0473(7) Uani 1 1 d . . .   |        |
| 25    | H1 H 0.7070 0.1093 -0.0044 0.057 Uiso 1 1 calc R . .              |        |
|       | C4 C 0.6348(8) 0.1263(2) 0.12381(19) 0.0498(8) Uani 1 1 d . B .   |        |
|       | C5 C 0.5136(9) 0.1885(3) 0.1865(2) 0.0585(9) Uani 1 1 d . . .     |        |
|       | H2 H 0.5223 0.1701 0.2445 0.070 Uiso 1 1 calc R . .               |        |
|       | C6 C 0.3812(9) 0.2768(3) 0.1633(2) 0.0584(9) Uani 1 1 d . . .     |        |
| 30    | H3 H 0.3009 0.3184 0.2057 0.070 Uiso 1 1 calc R . .               |        |
|       | C7 C 0.1161(11) 0.4583(3) 0.1125(3) 0.0789(12) Uani 1 1 d . . .   |        |
|       | H4 H -0.0453 0.4259 0.1481 0.118 Uiso 1 1 calc R . .              |        |
|       | H5 H 0.0097 0.5125 0.0838 0.118 Uiso 1 1 calc R . .               |        |
|       | H6 H 0.3012 0.4812 0.1481 0.118 Uiso 1 1 calc R . .               |        |
| 35    | N1 N 0.4816(8) 0.2633(2) -0.07822(18) 0.0628(8) Uani 1 1 d . . .  |        |
|       | N2 N 0.7807(8) 0.0329(2) 0.1488(2) 0.0645(8) Uani 1 1 d . . .     |        |
|       | O1 O 0.2399(7) 0.39137(18) 0.04925(15) 0.0670(8) Uani 1 1 d . . . |        |
|       | O2 O 0.3354(19) 0.3276(4) -0.1050(2) 0.194(3) Uani 1 1 d . A 1    |        |
|       | O3 O 0.6154(17) 0.2140(4) -0.1262(3) 0.205(4) Uani 1 1 d . A 1    |        |
| 40    | O4 O 0.8906(11) -0.0189(3) 0.0927(2) 0.1125(14) Uani 1 1 d . B 1  |        |
|       | O5 O 0.7894(10) 0.0104(3) 0.22458(19) 0.1040(12) Uani 1 1 d . B 1 |        |
| loop_ |                                                                   |        |
|       | _atom_site_aniso_label                                            |        |
|       | _atom_site_aniso_U_11                                             |        |
| 45    | _atom_site_aniso_U_22                                             |        |
|       | _atom_site_aniso_U_33                                             |        |
|       | _atom_site_aniso_U_23                                             |        |
|       | _atom_site_aniso_U_13                                             |        |

\_atom\_site\_aniso\_U\_12  
 C1 0.0486(17) 0.0576(18) 0.0484(17) -0.0082(14) -0.0025(13) 0.0037(14)  
 C2 0.0491(16) 0.0546(17) 0.0389(15) 0.0010(12) -0.0019(12) 0.0015(14)  
 C3 0.0498(16) 0.0532(17) 0.0392(14) -0.0022(12) 0.0063(11) 0.0008(13)  
 5 C4 0.0509(16) 0.0534(17) 0.0449(16) 0.0027(13) -0.0022(12) 0.0006(14)  
 C5 0.070(2) 0.071(2) 0.0353(15) -0.0017(14) -0.0017(13) -0.0037(17)  
 C6 0.066(2) 0.065(2) 0.0445(17) -0.0145(14) 0.0031(14) 0.0023(17)  
 C7 0.086(3) 0.070(2) 0.081(3) -0.026(2) -0.009(2) 0.022(2)  
 N1 0.084(2) 0.0614(17) 0.0428(15) 0.0044(13) 0.0009(14) 0.0171(16)  
 10 N2 0.075(2) 0.0651(18) 0.0531(17) 0.0119(14) 0.0017(14) 0.0070(15)  
 O1 0.0836(18) 0.0572(14) 0.0601(15) -0.0082(11) -0.0053(12) 0.0214(12)  
 O2 0.354(8) 0.176(4) 0.0516(19) -0.004(2) -0.028(3) 0.174(5)  
 O3 0.322(8) 0.232(6) 0.064(2) 0.060(3) 0.082(4) 0.186(6)  
 O4 0.170(4) 0.090(2) 0.078(2) 0.0194(17) 0.033(2) 0.065(2)  
 15 O5 0.157(3) 0.100(2) 0.0543(17) 0.0221(16) -0.0121(18) 0.026(2)  
 \_diffn\_measured\_fraction\_theta\_max 0.992  
 \_diffn\_reflns\_theta\_full 27.47  
 \_diffn\_measured\_fraction\_theta\_full 0.992  
 \_refine\_diff\_density\_max 0.562  
 20 \_refine\_diff\_density\_min -0.423  
 \_refine\_diff\_density\_rms 0.058

**data\_24dnan\_261K**

25 \_audit\_creation\_method SHELXL-97  
 \_chemical\_formula\_sum  
 'C7 H6 N2 O5'  
 \_chemical\_formula\_weight 198.14  
 loop\_  
 30 \_atom\_type\_symbol  
 \_atom\_type\_description  
 \_atom\_type\_scatter\_dispersion\_real  
 \_atom\_type\_scatter\_dispersion\_imag  
 \_atom\_type\_scatter\_source  
 35 'C' 'C' 0.0033 0.0016  
 'International Tables Vol C Tables 4.2.6.8 and 6.1.1.4'  
 'H' 'H' 0.0000 0.0000  
 'International Tables Vol C Tables 4.2.6.8 and 6.1.1.4'  
 'N' 'N' 0.0061 0.0033  
 40 'International Tables Vol C Tables 4.2.6.8 and 6.1.1.4'  
 'O' 'O' 0.0106 0.0060  
 'International Tables Vol C Tables 4.2.6.8 and 6.1.1.4'

\_symmetry\_cell\_setting monoclinic  
 45 \_symmetry\_space\_group\_name\_H-M 'P 21/n'

loop\_  
 \_symmetry\_equiv\_pos\_as\_xyz

```

'x, y, z'
'-x+1/2, y+1/2, -z+1/2'
'-x, -y, -z'
'x-1/2, -y-1/2, z-1/2'
5 _cell_length_a          3.9291(18)
  _cell_length_b         13.739(6)
  _cell_length_c         15.443(7)
  _cell_angle_alpha      90.00
  _cell_angle_beta      94.454(7)
10 _cell_angle_gamma     90.00
   _cell_volume          831.1(6)
   _cell_formula_units_Z 4
   _cell_measurement_temperature 261(2)
   _cell_measurement_reflns_used 1951
15 _cell_measurement_theta_min 3.0
   _cell_measurement_theta_max 27.5

   _exptl_crystal_description 'needle'
   _exptl_crystal_colour      'Pale yellow'
20 _exptl_crystal_size_max    0.38
   _exptl_crystal_size_mid    0.35
   _exptl_crystal_size_min    0.30
   _exptl_crystal_density_meas ?
   _exptl_crystal_density_diffn 1.583
25 _exptl_crystal_density_method 'not measured'
   _exptl_crystal_F_000       408
   _exptl_absorpt_coefficient_mu 0.138
   _exptl_absorpt_correction_type multi-scan
   _exptl_absorpt_correction_T_min 0.9730
30 _exptl_absorpt_correction_T_max 0.9730
   _exptl_absorpt_process_details
;CrystalClear (Rigaku Americas and Rigaku, 2009)
;

35 _diffn_ambient_temperature 261(2)
   _diffn_radiation_wavelength 0.71075
   _diffn_radiation_type       MoKαa
   _diffn_reflns_number        3742
   _diffn_reflns_av_R_equivalents 0.0187
40 _diffn_reflns_av_sigmaI/netI 0.0324
   _diffn_reflns_limit_h_min   -5
   _diffn_reflns_limit_h_max   4
   _diffn_reflns_limit_k_min   -17
   _diffn_reflns_limit_k_max   15
45 _diffn_reflns_limit_l_min   -19
   _diffn_reflns_limit_l_max   19
   _diffn_reflns_theta_min     3.03
   _diffn_reflns_theta_max     27.45

```

```

_reflns_number_total          1865
_reflns_number_gt             1160
_reflns_threshold_expression  >2sigma(I)

5 _computing_structure_solution ?
  _computing_structure_refinement 'SHELXL-97 (Sheldrick, 1997)'
  _computing_molecular_graphics 'Yadokari-XG 2009 (Wakita Nemoto et al., 2009)'
  _computing_publication_material
;Yadokari-XG 2009 (Wakita,Nemoto et al., 2009)
10 ;

  _refine_ls_structure_factor_coef Fsqd
  _refine_ls_matrix_type          full
  _refine_ls_weighting_scheme     calc
15 _refine_ls_weighting_details
'calc w=1/[ $\sigma^2(F_o^2)+(0.0938P)^2+0.0000P$ ] where  $P=(F_o^2+2F_c^2)/3$ '
  _atom_sites_solution_primary   direct
  _atom_sites_solution_secondary difmap
  _atom_sites_solution_hydrogens geom
20 _refine_ls_hydrogen_treatment ?
  _refine_ls_extinction_method   none
  _refine_ls_extinction_coef     ?
  _refine_ls_number_reflns       1865
  _refine_ls_number_parameters   151
25 _refine_ls_number_restraints  0
  _refine_ls_R_factor_all        0.0814
  _refine_ls_R_factor_gt         0.0542
  _refine_ls_wR_factor_ref       0.1710
  _refine_ls_wR_factor_gt        0.1543
30 _refine_ls_goodness_of_fit_ref 1.042
  _refine_ls_restrained_S_all    1.042
  _refine_ls_shift/su_max        0.021
  _refine_ls_shift/su_mean       0.006

35 loop_
  _atom_site_label
  _atom_site_type_symbol
  _atom_site_fract_x
  _atom_site_fract_y
40 _atom_site_fract_z
  _atom_site_U_iso_or_equiv
  _atom_site_adp_type
  _atom_site_occupancy
  _atom_site_symmetry_multiplicity
45 _atom_site_calc_flag
  _atom_site_refinement_flags
  _atom_site_disorder_assembly
  _atom_site_disorder_group

```

C1 C -0.1089(5) 0.31405(15) 0.42558(12) 0.0435(5) Uani 1 1 d . . .  
 C2 C -0.0201(5) 0.24159(14) 0.48716(11) 0.0424(5) Uani 1 1 d . . .  
 C3 C 0.1128(5) 0.15359(16) 0.46399(13) 0.0455(5) Uani 1 1 d . . .  
 H1 H 0.169(5) 0.1090(18) 0.5062(16) 0.060(7) Uiso 1 1 d . . .  
 5 C4 C 0.1565(5) 0.13672(15) 0.37740(12) 0.0454(5) Uani 1 1 d . . .  
 C5 C 0.0736(6) 0.20627(18) 0.31500(13) 0.0535(6) Uani 1 1 d . . .  
 H2 H 0.100(5) 0.1884(16) 0.2568(15) 0.056(6) Uiso 1 1 d . . .  
 C6 C -0.0576(6) 0.29362(17) 0.33895(13) 0.0515(6) Uani 1 1 d . . .  
 H3 H -0.117(6) 0.3389(18) 0.2946(17) 0.069(7) Uiso 1 1 d . . .  
 10 C7 C -0.3184(8) 0.4732(2) 0.3904(2) 0.0654(7) Uani 1 1 d . . .  
 H6 H -0.115(7) 0.4899(19) 0.3600(18) 0.080(8) Uiso 1 1 d . . .  
 H5 H -0.401(8) 0.523(2) 0.420(2) 0.093(10) Uiso 1 1 d . . .  
 H4 H -0.461(7) 0.4503(19) 0.346(2) 0.082(9) Uiso 1 1 d . . .  
 N1 N -0.0631(5) 0.25540(14) 0.57995(10) 0.0572(5) Uani 1 1 d . . .  
 15 N2 N 0.3002(5) 0.04392(15) 0.35298(12) 0.0602(6) Uani 1 1 d . . .  
 O1 O -0.2324(4) 0.39861(11) 0.45253(9) 0.0569(5) Uani 1 1 d . . .  
 O2 O -0.2615(7) 0.31475(16) 0.60141(12) 0.1106(9) Uani 1 1 d . . .  
 O3 O 0.0920(6) 0.20455(19) 0.63131(11) 0.1169(10) Uani 1 1 d . . .  
 O4 O 0.3506(7) -0.01841(16) 0.40818(13) 0.1047(8) Uani 1 1 d . . .  
 20 O5 O 0.3644(6) 0.03179(15) 0.27821(11) 0.0944(7) Uani 1 1 d . . .

loop\_

\_atom\_site\_aniso\_label  
 \_atom\_site\_aniso\_U\_11  
 25 \_atom\_site\_aniso\_U\_22  
 \_atom\_site\_aniso\_U\_33  
 \_atom\_site\_aniso\_U\_23  
 \_atom\_site\_aniso\_U\_13  
 \_atom\_site\_aniso\_U\_12  
 30 C1 0.0463(11) 0.0482(11) 0.0367(9) -0.0014(8) 0.0078(8) -0.0007(9)  
 C2 0.0476(11) 0.0510(11) 0.0292(8) -0.0033(8) 0.0065(8) -0.0033(9)  
 C3 0.0531(12) 0.0498(12) 0.0336(9) -0.0013(9) 0.0034(8) 0.0021(9)  
 C4 0.0465(11) 0.0529(12) 0.0373(10) -0.0092(9) 0.0061(8) -0.0013(9)  
 C5 0.0638(14) 0.0677(14) 0.0301(9) -0.0034(9) 0.0098(9) -0.0010(11)  
 35 C6 0.0605(13) 0.0605(13) 0.0343(10) 0.0062(10) 0.0081(9) 0.0040(11)  
 C7 0.0760(19) 0.0612(16) 0.0604(15) 0.0144(13) 0.0148(14) 0.0184(14)  
 N1 0.0874(14) 0.0530(11) 0.0321(8) -0.0033(8) 0.0109(9) 0.0075(10)  
 N2 0.0668(12) 0.0643(13) 0.0497(11) -0.0154(10) 0.0055(9) 0.0084(10)  
 O1 0.0744(10) 0.0533(9) 0.0444(8) 0.0047(7) 0.0140(7) 0.0143(7)  
 40 O2 0.195(2) 0.0929(15) 0.0515(10) 0.0148(10) 0.0558(13) 0.0613(16)  
 O3 0.172(2) 0.142(2) 0.0340(9) -0.0051(11) -0.0080(11) 0.0769(18)  
 O4 0.171(2) 0.0773(14) 0.0649(12) -0.0076(11) 0.0037(12) 0.0555(14)  
 O5 0.1394(18) 0.0900(14) 0.0580(11) -0.0217(10) 0.0351(11) 0.0245(13)

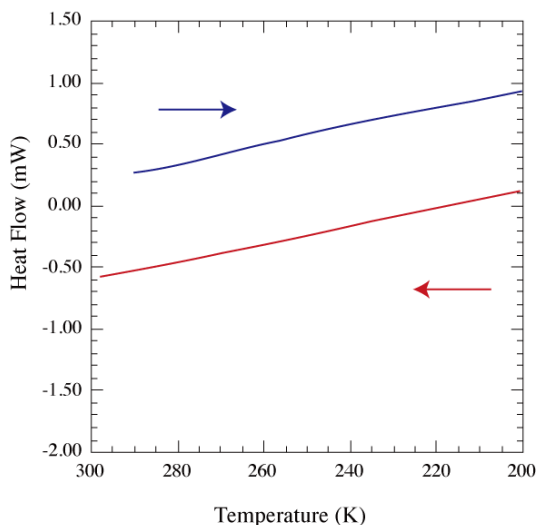

**Fig. S1** DSC plot of the  $\alpha$ —form crystal.

5

**Table S1** Crystal and experimental data for the  $\alpha$ —form

|                                                                                        |                                                             |                                                             |                                                             |                                                             |                                                             |                                                             |                                                             |                                                             |
|----------------------------------------------------------------------------------------|-------------------------------------------------------------|-------------------------------------------------------------|-------------------------------------------------------------|-------------------------------------------------------------|-------------------------------------------------------------|-------------------------------------------------------------|-------------------------------------------------------------|-------------------------------------------------------------|
| Compound reference                                                                     | 298                                                         | 273                                                         | 243                                                         | 213                                                         | 183                                                         | 153                                                         | 123                                                         | 100                                                         |
| Chemical formula                                                                       | C <sub>7</sub> H <sub>6</sub> N <sub>2</sub> O <sub>5</sub> | C <sub>7</sub> H <sub>6</sub> N <sub>2</sub> O <sub>5</sub> | C <sub>7</sub> H <sub>6</sub> N <sub>2</sub> O <sub>5</sub> | C <sub>7</sub> H <sub>6</sub> N <sub>2</sub> O <sub>5</sub> | C <sub>7</sub> H <sub>6</sub> N <sub>2</sub> O <sub>5</sub> | C <sub>7</sub> H <sub>6</sub> N <sub>2</sub> O <sub>5</sub> | C <sub>7</sub> H <sub>6</sub> N <sub>2</sub> O <sub>5</sub> | C <sub>7</sub> H <sub>6</sub> N <sub>2</sub> O <sub>5</sub> |
| Formula Mass                                                                           | 198.14                                                      | 198.14                                                      | 198.14                                                      | 198.14                                                      | 198.14                                                      | 198.14                                                      | 198.14                                                      | 198.14                                                      |
| Crystal system                                                                         | Monoclinic                                                  |
| <i>a</i> /Å                                                                            | 8.794(3)                                                    | 8.767(3)                                                    | 8.721(3)                                                    | 8.691(3)                                                    | 8.665(3)                                                    | 8.629(4)                                                    | 8.608(2)                                                    | 8.593(2)                                                    |
| <i>b</i> /Å                                                                            | 12.678(3)                                                   | 12.675(4)                                                   | 12.675(4)                                                   | 12.673(4)                                                   | 12.666(4)                                                   | 12.656(5)                                                   | 12.658(3)                                                   | 12.641(3)                                                   |
| <i>c</i> /Å                                                                            | 15.437(5)                                                   | 15.411(5)                                                   | 15.366(5)                                                   | 15.336(5)                                                   | 15.316(5)                                                   | 15.314(7)                                                   | 15.282(4)                                                   | 15.263(4)                                                   |
| $\alpha$ /°                                                                            | 90.00                                                       | 90.00                                                       | 90.00                                                       | 90.00                                                       | 90.00                                                       | 90.00                                                       | 90.00                                                       | 90.00                                                       |
| $\beta$ /°                                                                             | 98.052(4)                                                   | 97.912(5)                                                   | 97.580(4)                                                   | 97.417(4)                                                   | 97.277(3)                                                   | 97.292(6)                                                   | 97.022(3)                                                   | 97.065(4)                                                   |
| $\gamma$ /°                                                                            | 90.00                                                       | 90.00                                                       | 90.00                                                       | 90.00                                                       | 90.00                                                       | 90.00                                                       | 90.00                                                       | 90.00                                                       |
| Unit cell volume/Å <sup>3</sup>                                                        | 1704.1(9)                                                   | 1696.2(10)                                                  | 1683.7(10)                                                  | 1675.0(10)                                                  | 1667.4(10)                                                  | 1658.9(13)                                                  | 1652.6(7)                                                   | 1645.3(7)                                                   |
| Temperature/K                                                                          | 298                                                         | 273                                                         | 243                                                         | 213                                                         | 183                                                         | 153                                                         | 123                                                         | 100                                                         |
| Space group                                                                            | <i>P</i> 2 <sub>1</sub> / <i>n</i>                          |
| No. of formula units per unit cell, <i>Z</i>                                           | 8                                                           | 8                                                           | 8                                                           | 8                                                           | 8                                                           | 8                                                           | 8                                                           | 8                                                           |
| Absorption coefficient, $\mu$ /mm <sup>-1</sup>                                        | 0.134                                                       | 0.135                                                       | 0.136                                                       | 0.137                                                       | 0.137                                                       | 0.138                                                       | 0.138                                                       | 0.139                                                       |
| No. of reflections measured                                                            | 13575                                                       | 13531                                                       | 13438                                                       | 13317                                                       | 13280                                                       | 13236                                                       | 13148                                                       | 12659                                                       |
| No. of independent reflections                                                         | 3895                                                        | 3877                                                        | 3841                                                        | 3824                                                        | 3798                                                        | 3797                                                        | 3767                                                        | 3767                                                        |
| <i>R</i> <sub>int</sub>                                                                | 0.0345                                                      | 0.0323                                                      | 0.0330                                                      | 0.0314                                                      | 0.0291                                                      | 0.0302                                                      | 0.0300                                                      | 0.0381                                                      |
| Final <i>R</i> <sub><i>i</i></sub> values ( <i>I</i> > 2 $\sigma$ ( <i>I</i> ))        | 0.0594                                                      | 0.0578                                                      | 0.0524                                                      | 0.0503                                                      | 0.0482                                                      | 0.0442                                                      | 0.0405                                                      | 0.0354                                                      |
| Final <i>wR</i> ( <i>F</i> <sup>2</sup> ) values ( <i>I</i> > 2 $\sigma$ ( <i>I</i> )) | 0.1274                                                      | 0.1265                                                      | 0.1096                                                      | 0.1096                                                      | 0.1049                                                      | 0.0954                                                      | 0.0910                                                      | 0.0670                                                      |
| Final <i>R</i> <sub><i>i</i></sub> values (all data)                                   | 0.1067                                                      | 0.0985                                                      | 0.0837                                                      | 0.0749                                                      | 0.0692                                                      | 0.0644                                                      | 0.0565                                                      | 0.0587                                                      |
| Final <i>wR</i> ( <i>F</i> <sup>2</sup> ) values (all data)                            | 0.1483                                                      | 0.1466                                                      | 0.1239                                                      | 0.1211                                                      | 0.1150                                                      | 0.1074                                                      | 0.0984                                                      | 0.0730                                                      |
| Goodness of fit on <i>F</i> <sup>2</sup>                                               | 1.093                                                       | 1.046                                                       | 1.057                                                       | 1.071                                                       | 1.067                                                       | 1.050                                                       | 1.054                                                       | 0.879                                                       |

10

(a)

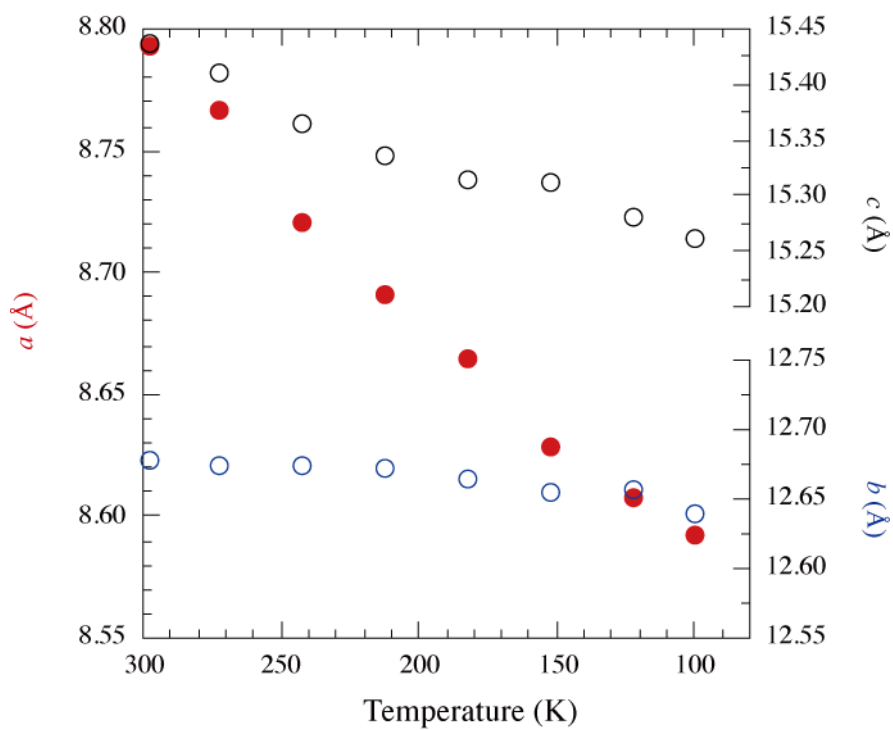

(b)

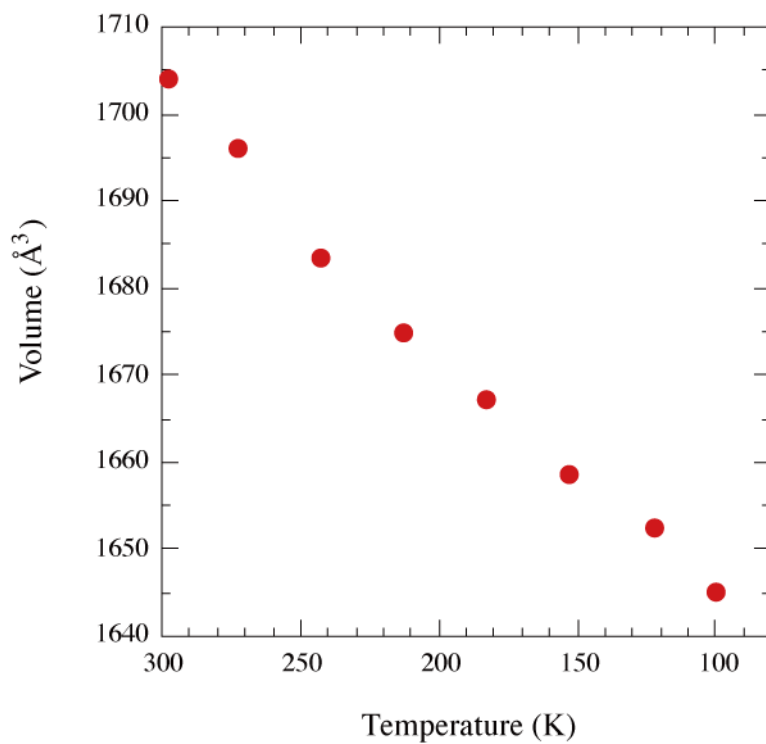

**Fig. S2** Variation of the unit cell parameters of the  $\alpha$ -form as a function of temperature; (a) cell lengths, and (b) volume.



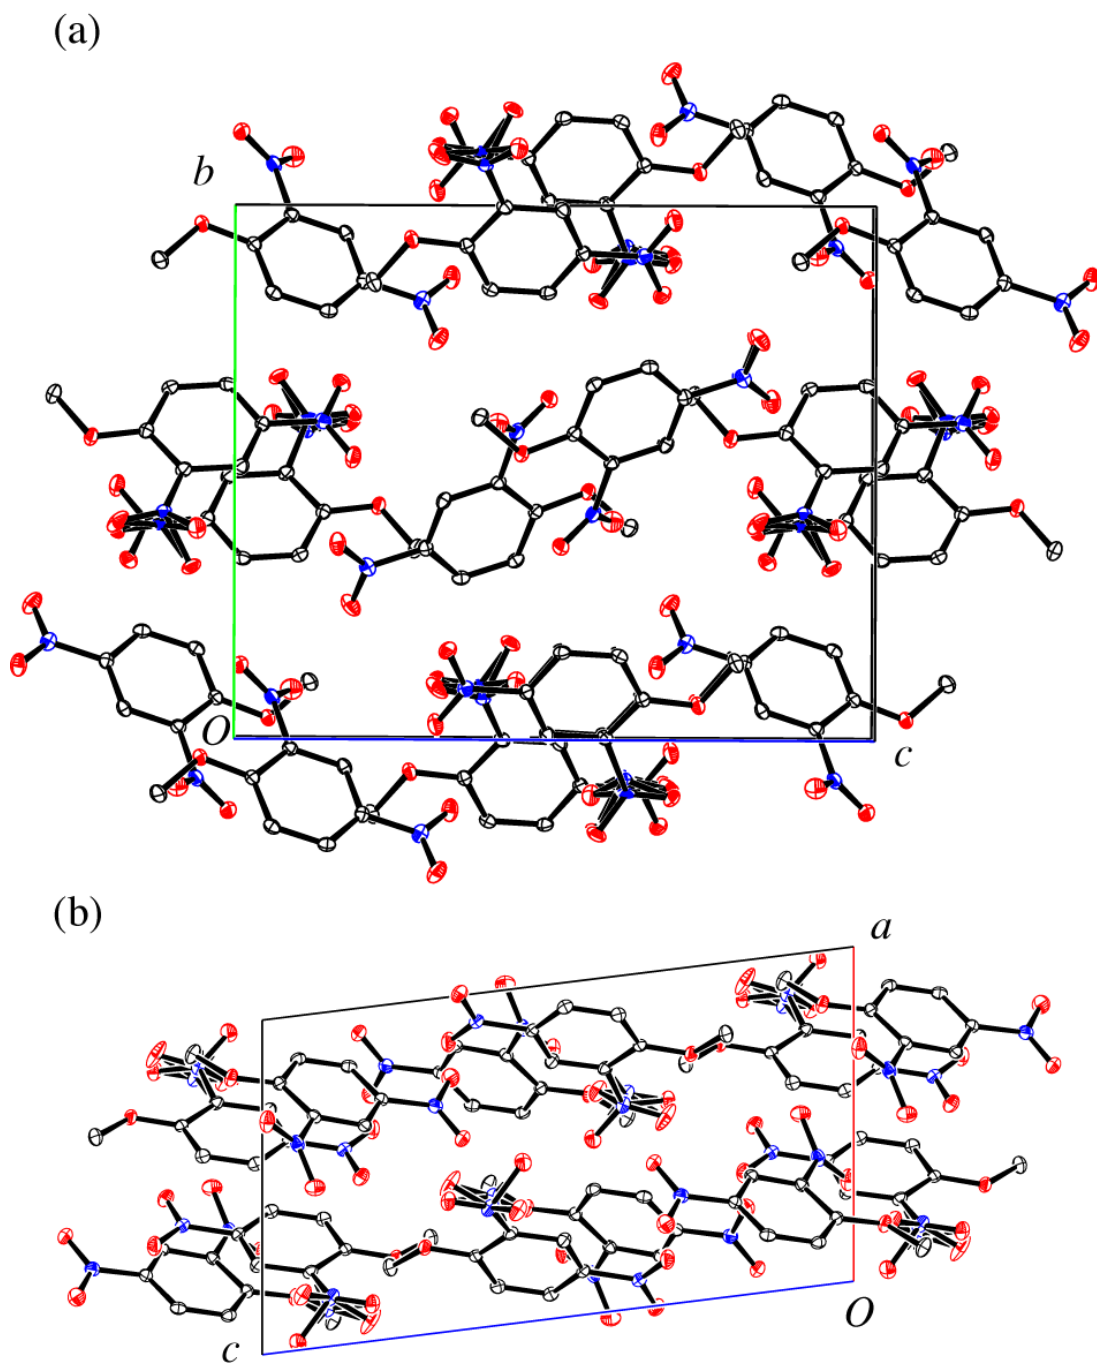

**Fig. S3** Crystal structure of the  $\alpha$ -form at 100 K (a) viewed down the  $a$  axis (b) viewed down the  $b$  axis. The hydrogen atoms have been omitted for clarity.

**Table S2** Principal coefficients of thermal expansion and corresponding principal axes determined for the  $\alpha$ —form temperature range of 293—100 K.

| Principal axis, $i$ | $\alpha_i$ (MK <sup>-1</sup> ) | Component of $\mathbf{x}_i$ along the crystallographic axes |     |        | Approximate axis |
|---------------------|--------------------------------|-------------------------------------------------------------|-----|--------|------------------|
|                     |                                | $a$                                                         | $b$ | $c$    |                  |
| 1                   | 13.7(19)                       | 0                                                           | -1  | 0      | [010]            |
| 2                   | 26.6 (13)                      | 0.6188                                                      | 0   | 0.7855 | [101]            |
| 3                   | 136(7)                         | -0.9823                                                     | 0   | 0.1875 | [100]            |

**Table S3** Short ring-interactions with Cg-Cg distances for the  $\beta$ —form <sup>a</sup>

| Temp. (K) | Cg1-Cg2 distance (Å) | $\beta$ (°) <sup>b</sup> | plane      | slippage (Å) | $\theta$ (°) <sup>c</sup> |
|-----------|----------------------|--------------------------|------------|--------------|---------------------------|
| 298       | 3.980(3)             | 25.4                     | 3.5937(12) | 1.710        | 65.2                      |
| 283       | 3.962(3)             | 25.2                     | 3.5822(13) | 1.692        | 65.4                      |
| 273       | 3.957(3)             | 25.2                     | 3.5781(13) | 1.690        | 65.4                      |
| 261       | 3.929(2)             | 23.4                     | 3.6051(9)  | 1.562        | 67.9                      |
| 236       | 3.908(3)             | 23.4                     | 3.5841(7)  | 1.558        | 68.5                      |
| 226       | 3.897(2)             | 23.4                     | 3.5753(7)  | 1.550        | 69.0                      |
| 208       | 3.880(2)             | 23.3                     | 3.5614(6)  | 1.540        | 69.2                      |
| 198       | 3.876(2)             | 23.4                     | 3.5557(6)  | 1.543        | 69.4                      |
| 173       | 3.854(2)             | 23.5                     | 3.5342(6)  | 1.536        | 69.4                      |
| 128       | 3.828(2)             | 23.5                     | 3.5102(5)  | 1.527        | 69.8                      |
| 100       | 3.814(1)             | 23.5                     | 3.4966(5)  | 1.523        | 70.0                      |

<sup>a</sup>Distances between center of gravity of phenyl ring (Cg1:  $x, y, z$ ) and (Cg2:  $-1 + x, y, z$ ) within 6.0 Å and  $\beta$  angle < 60°. <sup>b</sup>Angle between Cg1  $\rightarrow$  Cg2 vector and normal to plane 2 as shown Fig. S4. <sup>c</sup>This angle is defined in the main text.

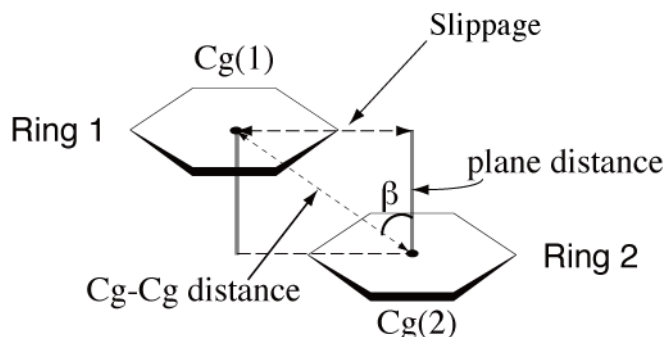

**Fig. S4** Definition of parameters in Table S3.

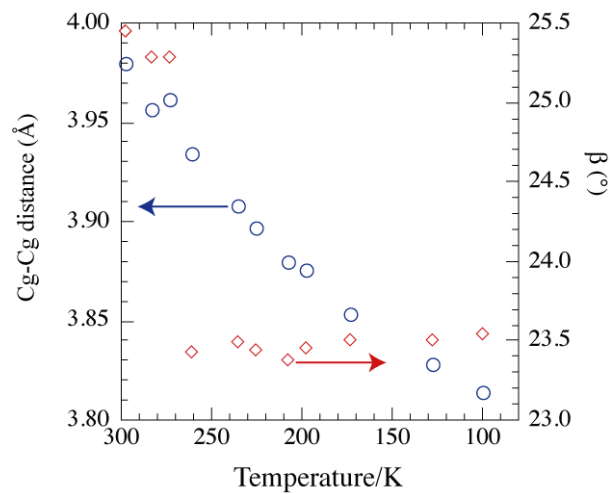

**Fig. S5** Variation of the  $\pi$ - $\pi$  interactions parameters in the  $\beta$ -form crystal as a function of temperature. The blue open circles and red open diamonds represent the Cg1-Cg2 distance and the  $\beta$  angle from Table S3, respectively.
